# Supplementary material
Source: ML conference proceedings conference paper supplement (https://openreview.net/forum?id=SqGn6phAxR)

Mean Absolute Error

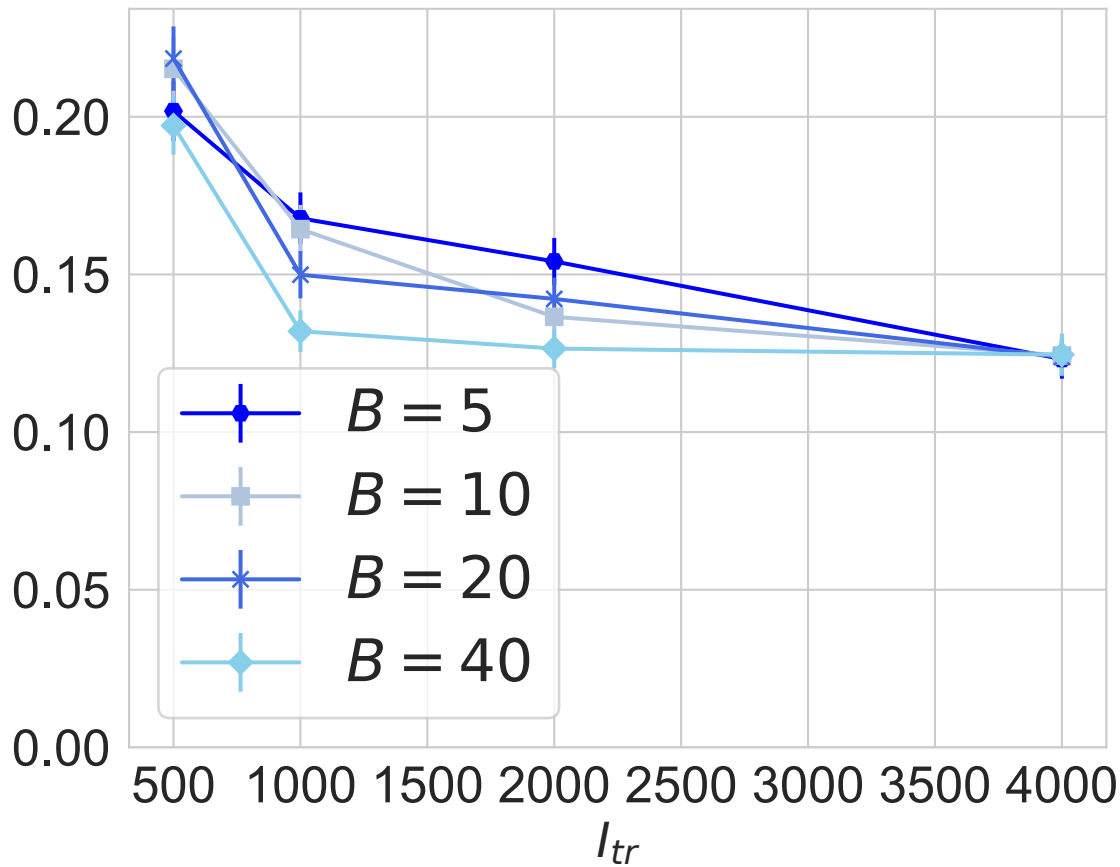

Supplement: supplementary_material [file attachment]

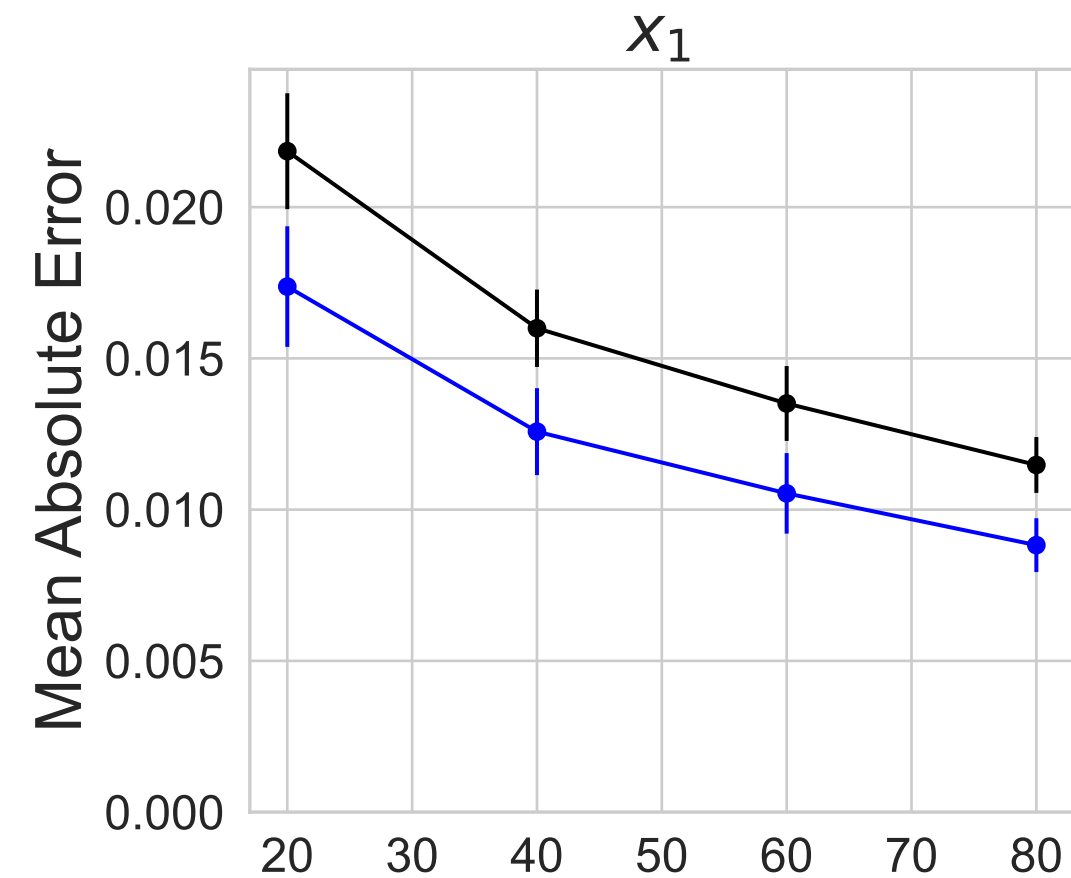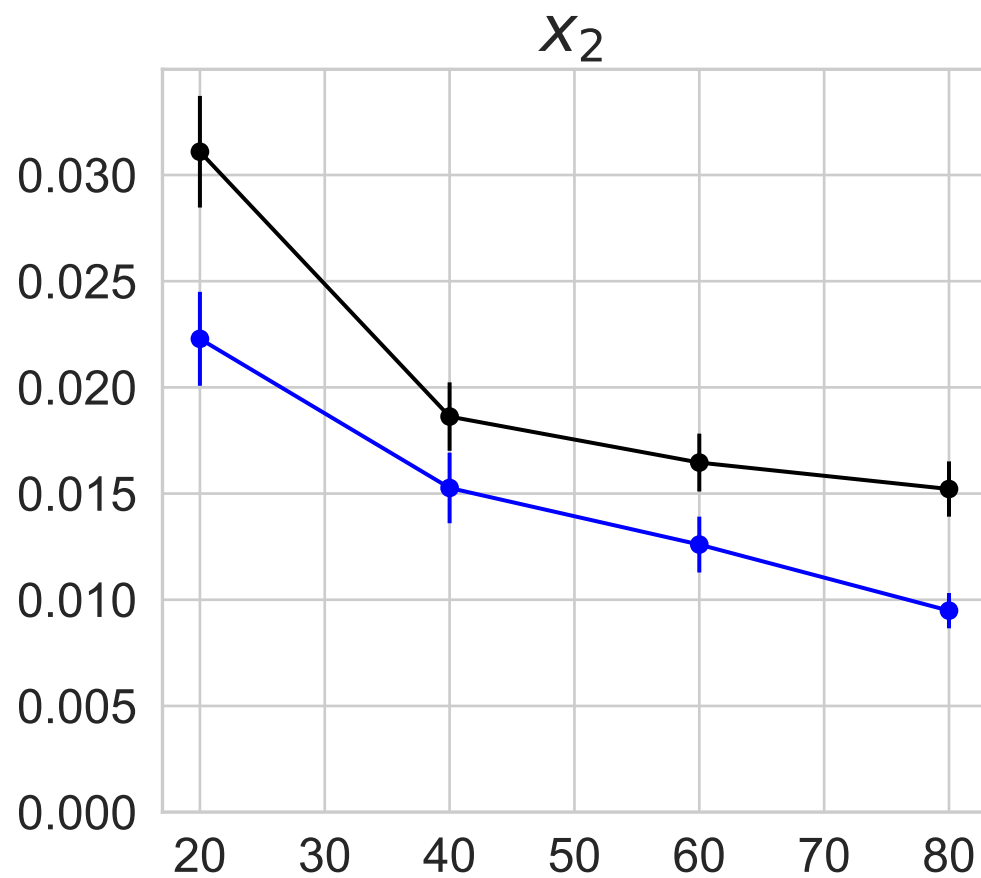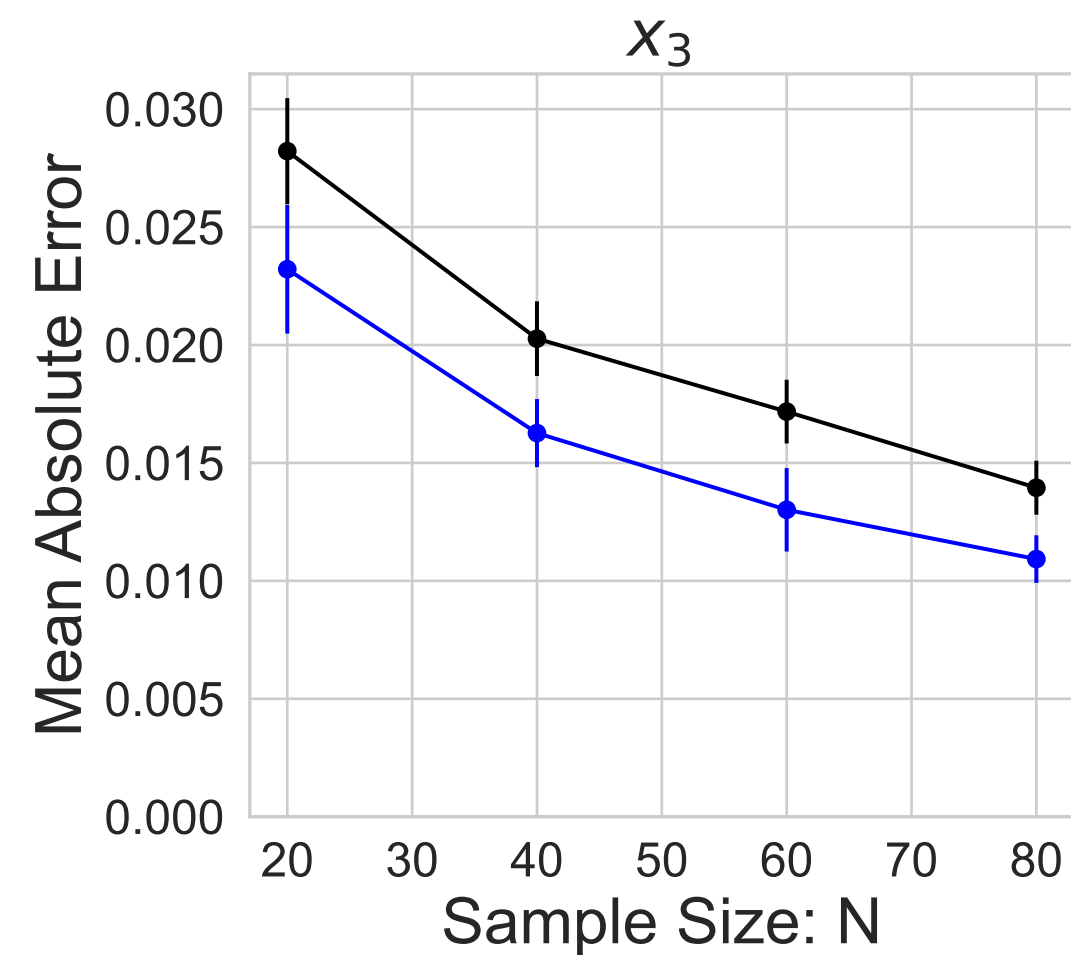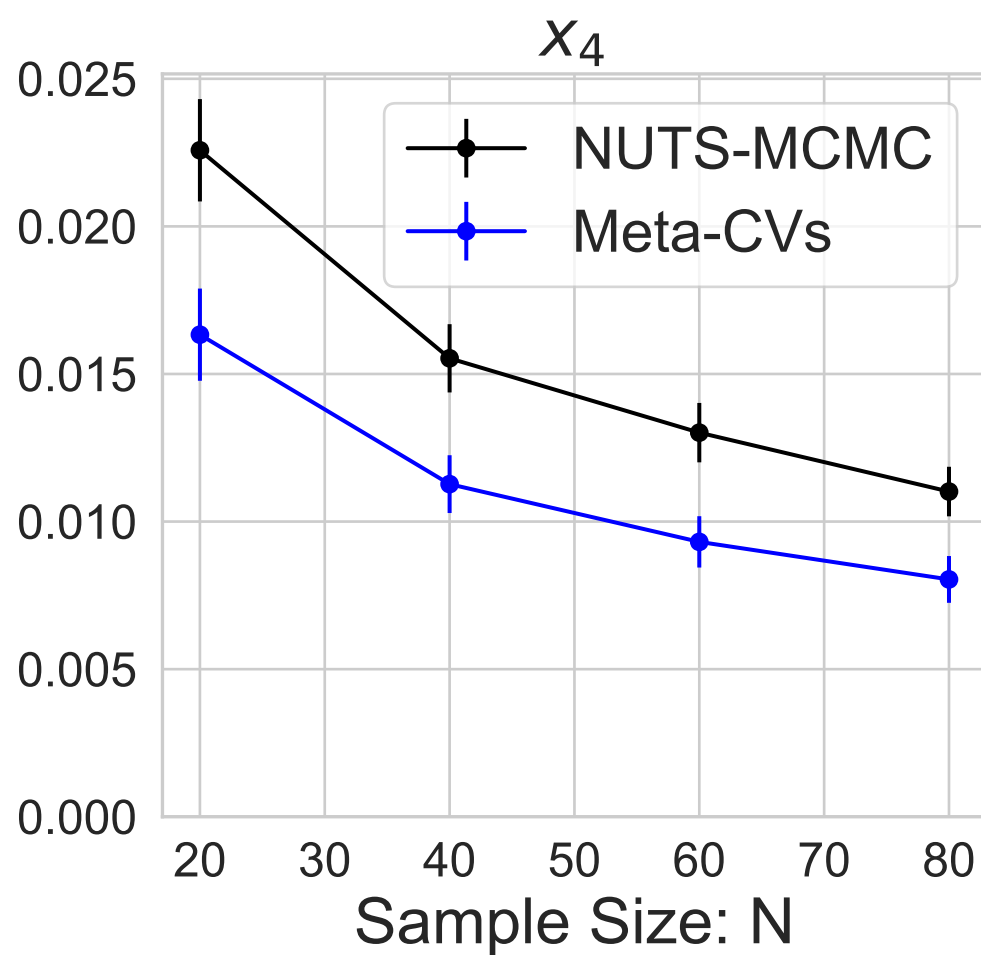

Supplement: supplementary_material [file attachment]

Mean Absolute Error

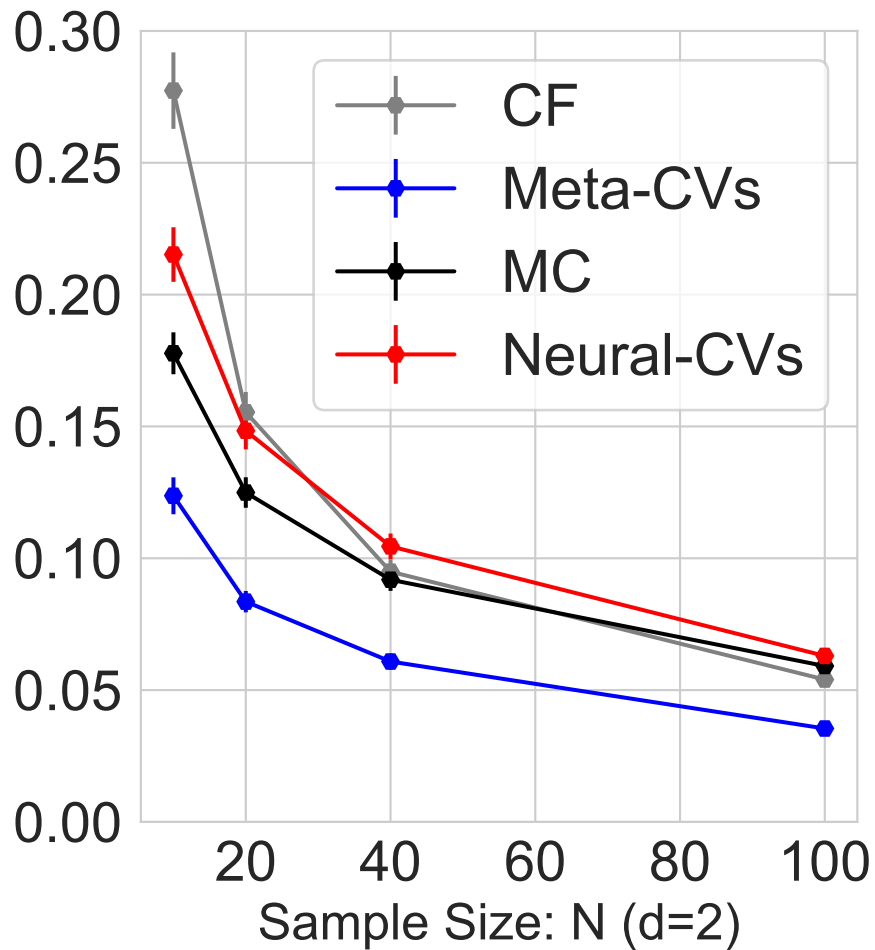

Mean Absolute Error

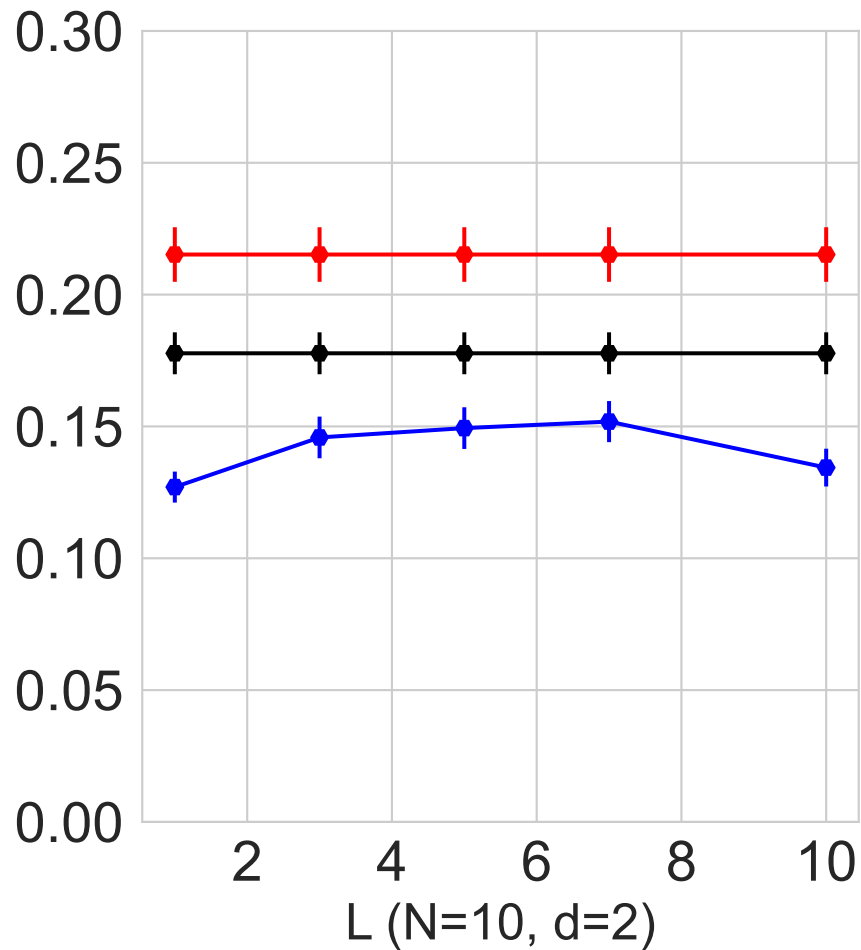

Supplement: supplementary_material [file attachment]

Estimated Absolute Error

0.175  
0.150  
0.125  
0.100  
0.075  
0.050

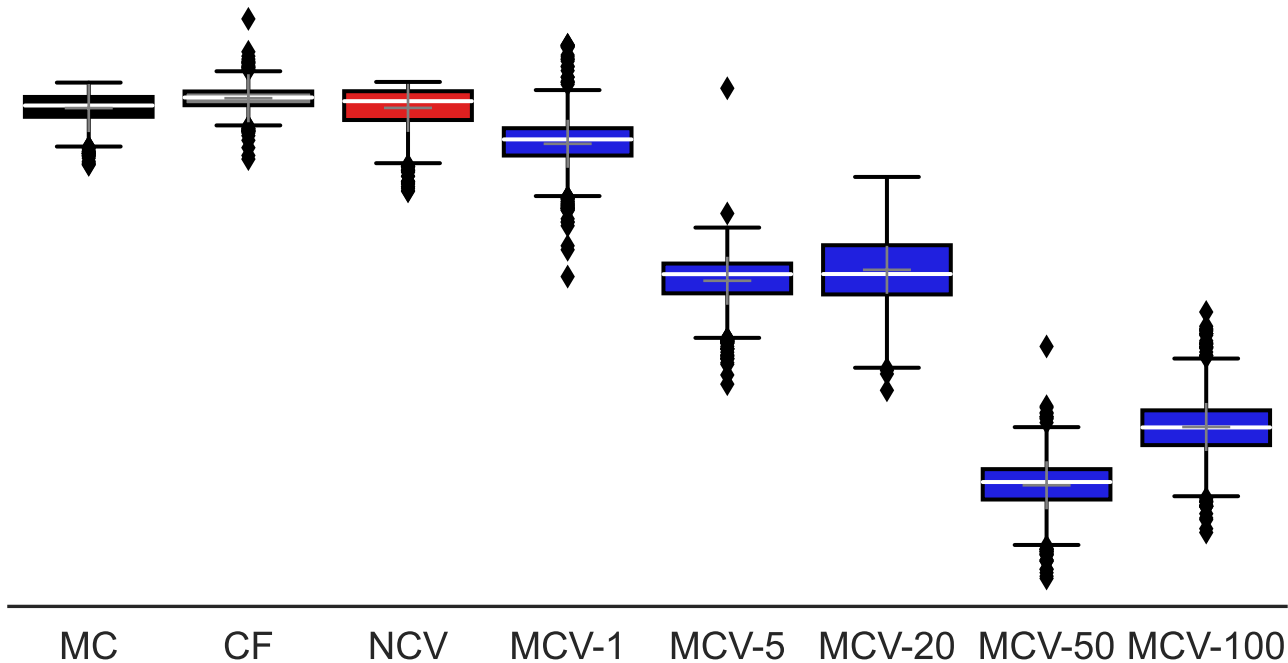

Supplement: supplementary_material [file attachment]

Mean Absolute Error

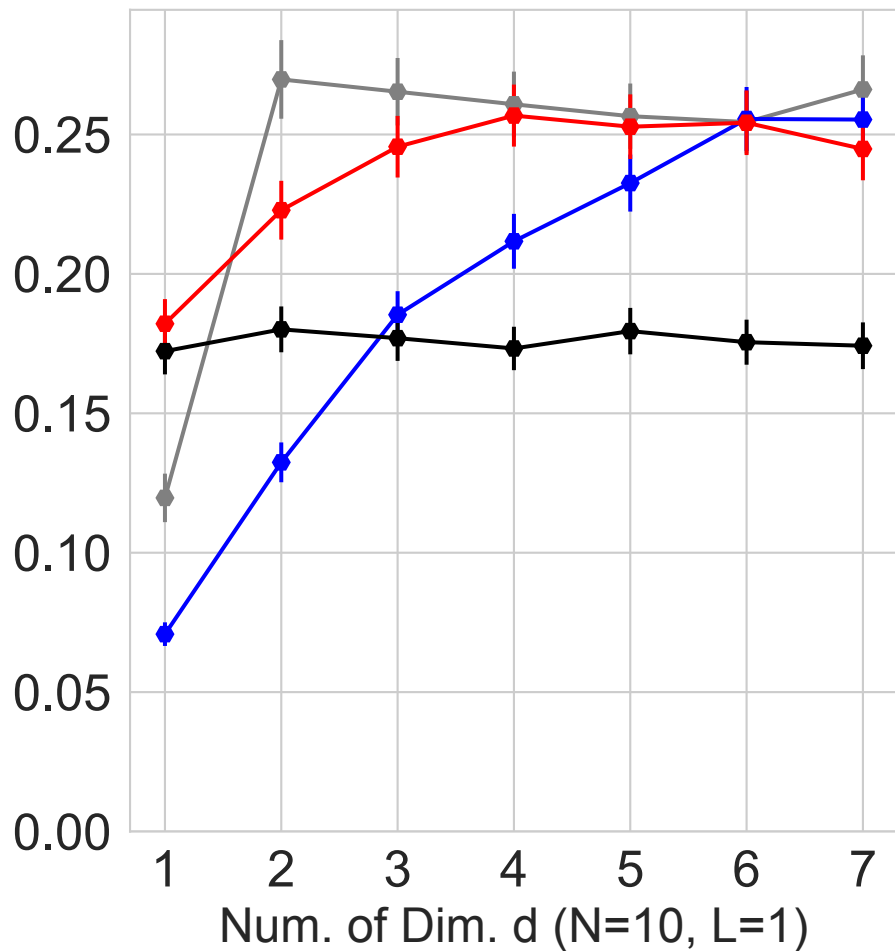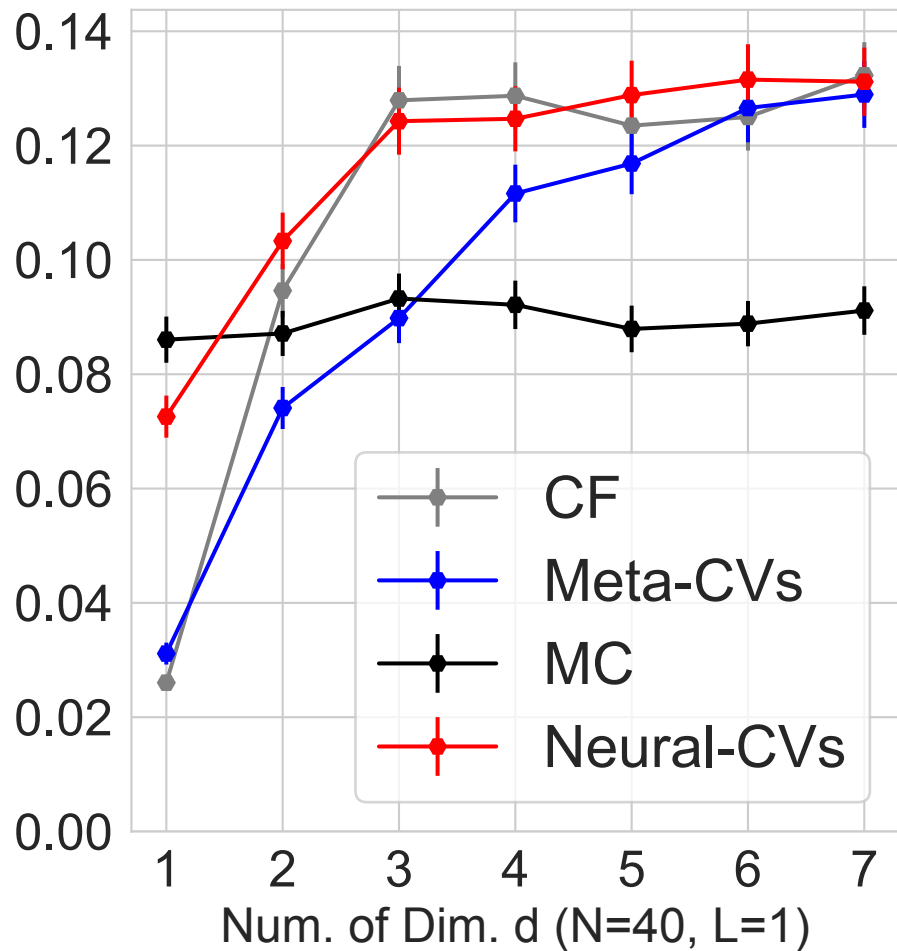

Supplement: supplementary_material [file attachment]

Prior of  $x$

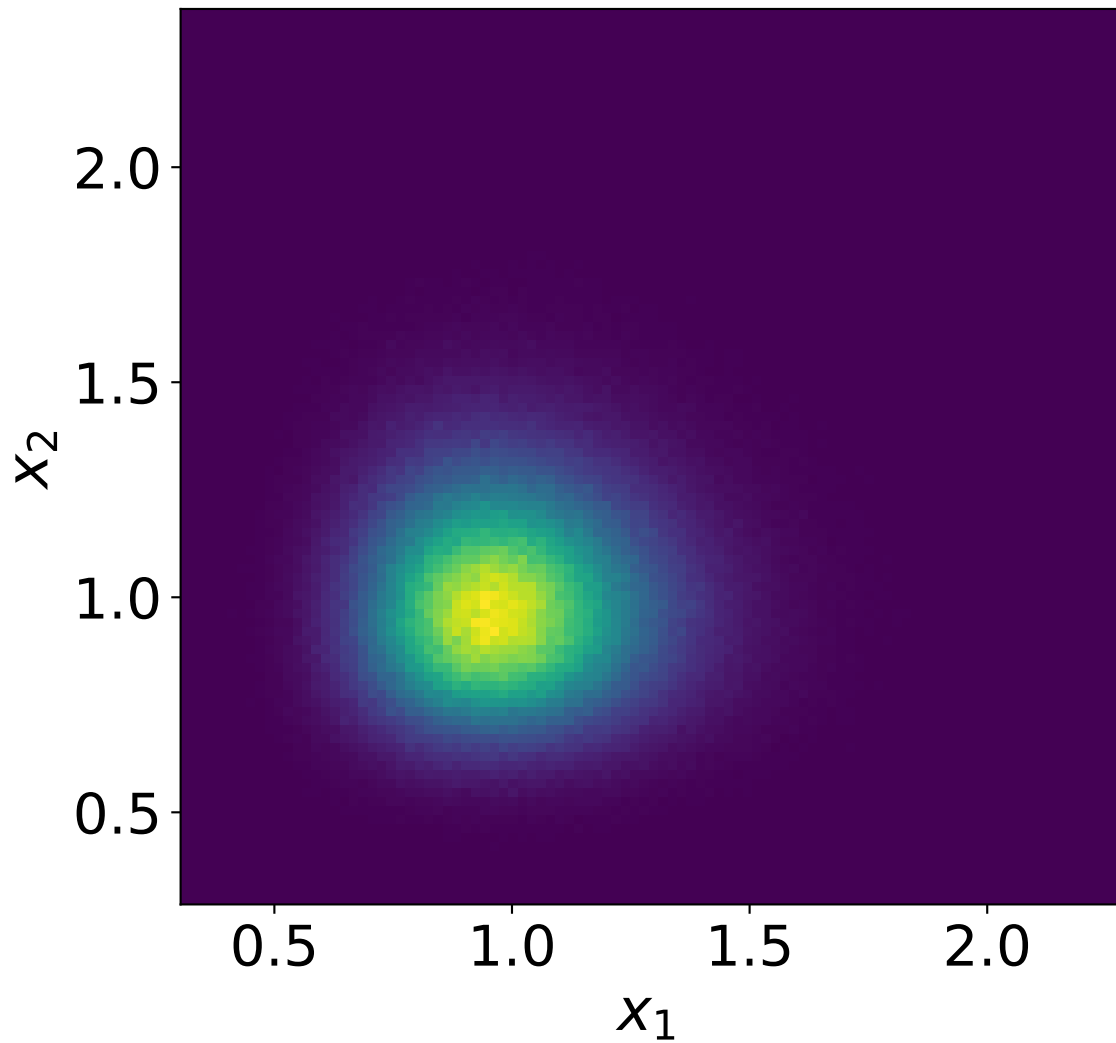

Posterior of  $x$

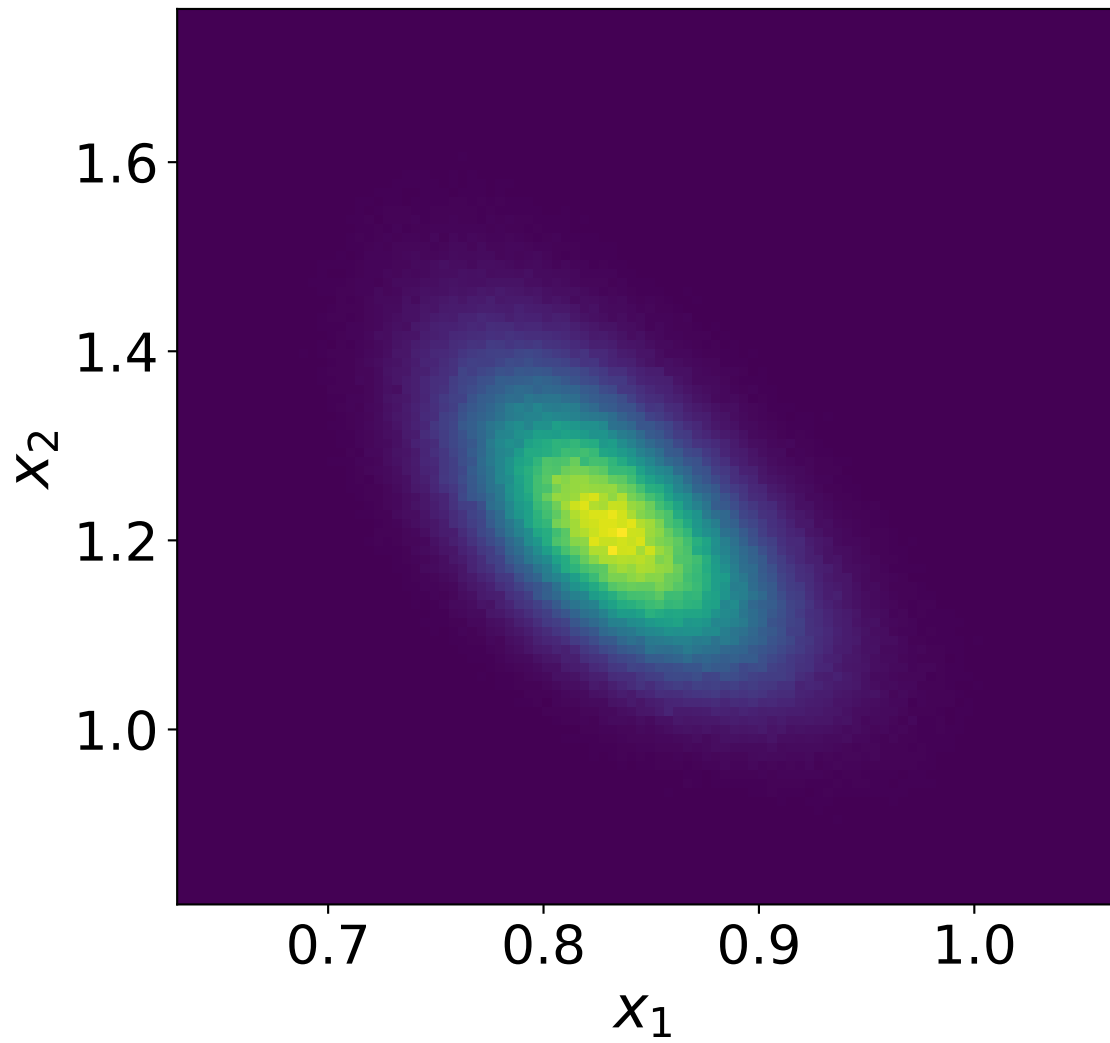

Supplement: supplementary_material [file attachment]

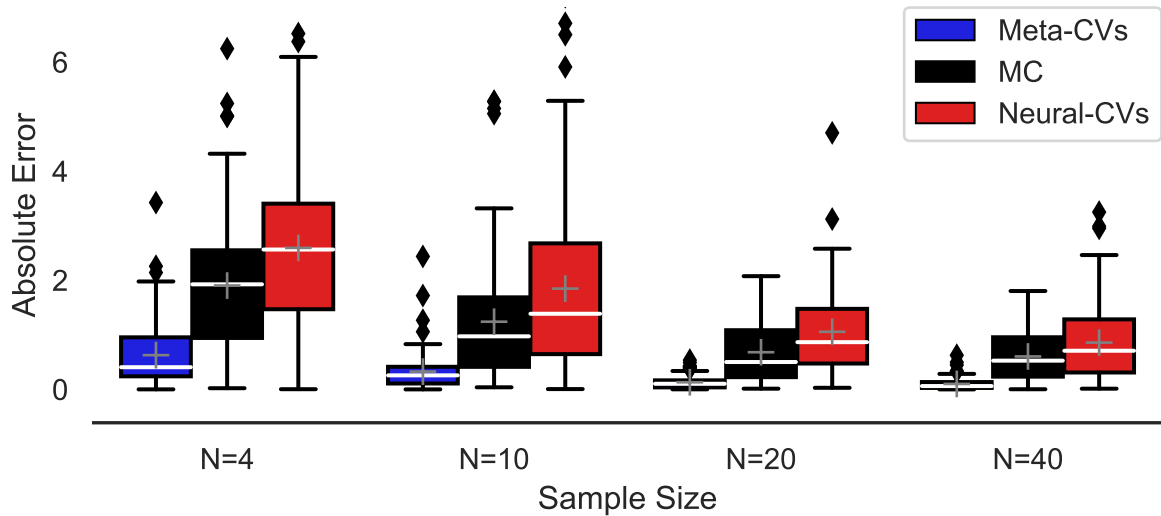

Supplement: supplementary_material [file attachment]

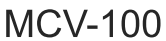

Supplement: supplementary_material [file attachment]
